# Supplementary material
Source: publisher site journal article supplement (https://www.dovepress.com/article/440832)
Supplement: Supplementary file 1 [file get_supplementary_file.php]

Supplementary Material

Table S1: Univariate and multivariate analysis for OS in patients under 60 years old

|  | Characteristics | HR (95% CI) | P | HR (95% CI) | P |
| --- | --- | --- | --- | --- | --- |
| 1 | pT2 | 1.27 (0.47-3.43) | 0.638 | 1.62 ( 0.43 - 6.12 ) | 0.4786 |
| 2 | pT3 | 6.6 (3.53-12.33) | 0 | 8.97 ( 1.87 - 43.1 ) | 0.0062 |
| 3 | pT4a | 7.08 (3.37-14.89) | 0 | 8.44 ( 1.56 - 45.57 ) | 0.0132 |
| 4 | pT4a | 8.66 (4.42-16.96) | 0 | 9.06 ( 1.68 - 48.8 ) | 0.0103 |
| 5 | pN1 | 2.57 (1.5-4.41) | 0.001 | 2.1 ( 1.12 - 3.95 ) | 0.0209 |
| 6 | pN2 | 4.39 (2.71-7.11) | 0 | 5.5 ( 2.3 - 13.18 ) | 1.00E-04 |
| 7 | pN3a | 7.65 (4.73-12.37) | 0 | 9.86 ( 3.89 - 25 ) | 0 |
| 8 | pN3b | 14.89 (8.74-25.37) | 0 | 19.37 ( 5.39 - 69.61 ) | 0 |
| 9 | pTNM2 | 2.88 (1.51-5.48) | 0.001 | 0.34 ( 0.08 - 1.38 ) | 0.1303 |
| 10 | pTNM3 | 9 (5.08-15.96) | 0 | 0.19 ( 0.03 - 1.17 ) | 0.0731 |
| 11 | Borrmanntype1 | 6.62 (2.22-19.7) | 0.001 | 1.49 ( 0.33 - 6.78 ) | 0.6084 |
| 12 | Borrmanntype2 | 3.65 (1.64-8.13) | 0.002 | 0.62 ( 0.17 - 2.23 ) | 0.4627 |
| 13 | Borrmanntype3 | 4.74 (2.2-10.22) | 0 | 0.66 ( 0.19 - 2.28 ) | 0.5094 |
| 14 | Borrmanntype4 | 13.74 (5.52-34.19) | 0 | 1.04 ( 0.26 - 4.14 ) | 0.9554 |
| 15 | Borrmanntype5 | 12.61 (4.56-34.83) | 0 | 0.9 ( 0.21 - 3.93 ) | 0.8904 |
| 16 | LNM | 1.06 (1.05-1.07) | 0 | 0.98 ( 0.95 - 1.02 ) | 0.2823 |
| 17 | R1 | 2.61 (1.63-4.18) | 0 | 1.31 ( 0.77 - 2.24 ) | 0.3251 |
| 18 | R2 | 7.83 (4.73-12.96) | 0 | 5.35 ( 3.01 - 9.53 ) | 0 |
| 19 | NLR | 1.64 (1.21-2.22) | 0.001 | 1.2 ( 0.84 - 1.71 ) | 0.3217 |
| 20 | PNI | 0.59 (0.43-0.8) | 0.001 | 1.08 ( 0.73 - 1.58 ) | 0.7081 |
| 21 | LLR | 1.76 (1.3-2.39) | 0 | 1.22 ( 0.86 - 1.71 ) | 0.2662 |
| 22 | FAR | 1.65 (1.21-2.23) | 0.001 | 0.8 ( 0.56 - 1.16 ) | 0.2408 |
| 23 | FPR | 2.48 (1.78-3.46) | 0 | 1.59 ( 1.04 - 2.44 ) | 0.031 |
| 24 | SEX | 1.01 (0.73-1.39) | 0.974 | NA | NA |

**Abbreviations:** OS, overall survival; HR, hazard ratio; Cl, confidence interval; LNM, lymph node metastasis; FPR, the ratio of fibrinogen to prealbumin; NLR, the ratio of neutrophils to lymphocytes; PNI, albumin + 5 * lymphocytes; LLR, the ratio of lactate dehydrogenase to lymphocytes; FAR, the ratio of fibrinogen to albumin.

Table S2: Univariate and multivariate analysis for OS in patients over 60 years old

|  | Characteristics | HR (95% CI) | P | HR (95% CI) | P |
| --- | --- | --- | --- | --- | --- |
| 1 | pT2 | 1.22 (0.31-4.9) | 0.774 | 1.79 ( 0.25 - 12.74 ) | 0.5592 |
| 2 | pT3 | 7.26 (3.09-17.06) | 0 | 4.74 ( 0.61 - 37.05 ) | 0.1383 |
| 3 | pT4a | 15 (5.91-38.09) | 0 | 5.2 ( 0.59 - 45.57 ) | 0.1365 |
| 4 | pT4b | 27.79 (11.74-65.78) | 0 | 10.31 ( 1.18 - 90.2 ) | 0.035 |
| 5 | pN1 | 4.87 (2.15-11.03) | 0 | 3.57 ( 1.4 - 9.11 ) | 0.0079 |
| 6 | pN2 | 11.36 (5.3-24.34) | 0 | 5.17 ( 1.62 - 16.49 ) | 0.0055 |
| 7 | pN3a | 18.21 (8.79-37.74) | 0 | 5.18 ( 1.46 - 18.32 ) | 0.0108 |
| 8 | pN3b | 28.46 (12.96-62.48) | 0 | 3.46 ( 0.53 - 22.57 ) | 0.1943 |
| 9 | pTNM2 | 3.01 (1.14-7.92) | 0.026 | 0.77 ( 0.11 - 5.25 ) | 0.7889 |
| 10 | pTNM3 | 21.69 (9.48-49.65) | 0 | 1.16 ( 0.11 - 12.43 ) | 0.9008 |
| 11 | Borrmanntype1 | 3.69 (0.83-16.5) | 0.087 | 0.4 ( 0.05 - 3.13 ) | 0.3814 |
| 12 | Borrmanntype2 | 3.16 (1.08-9.3) | 0.036 | 0.2 ( 0.03 - 1.26 ) | 0.0867 |
| 13 | Borrmanntype3 | 4.97 (1.81-13.61) | 0.002 | 0.3 ( 0.05 - 1.72 ) | 0.1756 |
| 14 | Borrmanntype4 | 14.54 (4.55-46.44) | 0 | 1.04 ( 0.16 - 6.72 ) | 0.967 |
| 15 | Borrmanntype5 | 11.2 (2.8-44.83) | 0.001 | 0.19 ( 0.02 - 1.5 ) | 0.1159 |
| 16 | LNM | 1.1 (1.08-1.12) | 0 | 1.02 ( 0.96 - 1.09 ) | 0.5271 |
| 17 | R1 | 6.69 (3.98-11.23) | 0 | 2.06 ( 1.04 - 4.08 ) | 0.0371 |
| 18 | R2 | 8.89 (4.99-15.85) | 0 | 3.28 ( 1.66 - 6.48 ) | 6.00E-04 |
| 19 | NLR | 1.72 (1.18-2.51) | 0.005 | 0.9 ( 0.57 - 1.44 ) | 0.6703 |
| 20 | PNI | 0.42 (0.28-0.65) | 0 | 1.31 ( 0.71 - 2.39 ) | 0.3897 |
| 21 | FAR | 2.77 (1.9-4.04) | 0 | 1.64 ( 0.93 - 2.91 ) | 0.0903 |
| 22 | FPR | 2.98 (2.04-4.34) | 0 | 1.12 ( 0.64 - 1.97 ) | 0.6845 |
| 23 | SEX | 1.01 (0.66-1.57) | 0.952 | NA | NA |
| 24 | LLR | 1.28 (0.86-1.91) | 0.22 | NA | NA |

**Abbreviations:** OS, overall survival; HR, hazard ratio; Cl, confidence interval; LNM, lymph node metastasis; FPR, the ratio of fibrinogen to prealbumin; NLR, the ratio of neutrophils to lymphocytes; PNI, albumin + 5 * lymphocytes; LLR, the ratio of lactate dehydrogenase to lymphocytes; FAR, the ratio of fibrinogen to albumin.

Table S3: Univariate and multivariate analysis for OS in the male patient group

|  | Characteristics | HR (95% CI) | P | HR (95% CI) | P |
| --- | --- | --- | --- | --- | --- |
| 1 | AGE | 1.63 (1.23-2.16) | 0.001 | 1.52 ( 1.11 - 2.07 ) | 0.0092 |
| 2 | pT2 | 1.1 (0.47-2.59) | 0.83 | 1.99 ( 0.61 - 6.5 ) | 0.2564 |
| 3 | pT3 | 5.98 (3.48-10.3) | 0 | 11.64 ( 2.79 - 48.58 ) | 8.00E-04 |
| 4 | pT4a | 7.23 (3.79-13.78) | 0 | 12.35 ( 2.7 - 56.43 ) | 0.0012 |
| 5 | pT4b | 10.05 (5.65-17.9) | 0 | 13.26 ( 2.9 - 60.54 ) | 9.00E-04 |
| 6 | pN1 | 2.83 (1.7-4.73) | 0 | 2.92 ( 1.61 - 5.3 ) | 4.00E-04 |
| 7 | pN2 | 5.1 (3.22-8.08) | 0 | 6.1 ( 2.7 - 13.78 ) | 0 |
| 8 | pN3a | 9.75 (6.3-15.07) | 0 | 9.98 ( 4.26 - 23.39 ) | 0 |
| 9 | pN3b | 15.07 (9.28-24.48) | 0 | 13.44 ( 4.07 - 44.33 ) | 0 |
| 10 | pTNM2 | 2.29 (1.29-4.08) | 0.005 | 0.27 ( 0.08 - 0.96 ) | 0.0437 |
| 11 | pTNM3 | 9.91 (6.07-16.18) | 0 | 0.19 ( 0.04 - 1 ) | 0.0495 |
| 12 | Borrmanntype1 | 3.38 (1.29-8.88) | 0.013 | 0.86 ( 0.24 - 3.03 ) | 0.8094 |
| 13 | Borrmanntype2 | 2.59 (1.3-5.16) | 0.007 | 0.35 ( 0.11 - 1.1 ) | 0.072 |
| 14 | Borrmanntype3 | 3.73 (1.96-7.12) | 0 | 0.43 ( 0.14 - 1.28 ) | 0.129 |
| 15 | Borrmanntype4 | 8.63 (3.73-20.01) | 0 | 0.72 ( 0.21 - 2.5 ) | 0.6068 |
| 16 | Borrmanntype5 | 11.53 (4.79-27.74) | 0 | 0.64 ( 0.17 - 2.4 ) | 0.5085 |
| 17 | LNM | 1.07 (1.06-1.08) | 0 | 0.99 ( 0.96 - 1.03 ) | 0.6147 |
| 18 | R1 | 3.32 (2.14-5.16) | 0 | 1.24 ( 0.73 - 2.08 ) | 0.4261 |
| 19 | R2 | 9.08 (5.76-14.31) | 0 | 4.31 ( 2.53 - 7.33 ) | 0 |
| 20 | NLR | 1.64 (1.24-2.17) | 0.001 | 1.41 ( 1 - 1.98 ) | 0.0495 |
| 21 | PNI | 0.52 (0.39-0.7) | 0 | 1.16 ( 0.79 - 1.7 ) | 0.4632 |
| 22 | LLR | 1.42 (1.06-1.91) | 0.017 | 0.95 ( 0.67 - 1.35 ) | 0.7665 |
| 23 | FAR | 1.99 (1.5-2.63) | 0 | 0.83 ( 0.57 - 1.2 ) | 0.3201 |
| 24 | FPR | 2.56 (1.93-3.4) | 0 | 1.39 ( 0.92 - 2.1 ) | 0.1152 |

**Abbreviations:** OS, overall survival; HR, hazard ratio; Cl, confidence interval; LNM, lymph node metastasis; FPR, the ratio of fibrinogen to prealbumin; NLR, the ratio of neutrophils to lymphocytes; PNI, albumin + 5 * lymphocytes; LLR, the ratio of lactate dehydrogenase to lymphocytes; FAR, the ratio of fibrinogen to albumin.

Table S4: Univariate and multivariate analysis for OS in the female patient group

|  | Characteristics | HR (95% CI) | P | HR (95% CI) | P |
| --- | --- | --- | --- | --- | --- |
| 1 | AGE | 1.61 (1.01-2.56) | 0.044 | 2.17 ( 1.27 - 3.71 ) | 0.0045 |
| 2 | pT2 | 1.93 (0.18-21.31) | 0.591 | 2.04 ( 0.11 - 37.38 ) | 0.6295 |
| 3 | pT3 | 16.26 (3.92-67.41) | 0 | 4.81 ( 0.39 - 59.41 ) | 0.2211 |
| 4 | pT4a | 31.24 (6.98-139.82) | 0 | 6.45 ( 0.44 - 95.5 ) | 0.1751 |
| 5 | pT4b | 54.71 (12.96-231.03) | 0 | 10.74 ( 0.77 - 150.12 ) | 0.0778 |
| 6 | pN1 | 5.28 (1.9-14.65) | 0.001 | 1.56 ( 0.46 - 5.35 ) | 0.4781 |
| 7 | pN2 | 12.88 (4.91-33.81) | 0 | 3.56 ( 0.72 - 17.74 ) | 0.1209 |
| 8 | pN3a | 14.83 (5.63-39.11) | 0 | 4.32 ( 0.73 - 25.46 ) | 0.1055 |
| 9 | pN3b | 35.66 (12.69-100.21) | 0 | 5.72 ( 0.46 - 71.7 ) | 0.1766 |
| 10 | pTNM2 | 16.39 (2.14-125.29) | 0.007 | 3.03 ( 0.18 - 52.56 ) | 0.4459 |
| 11 | pTNM3 | 71.74 (9.94-517.54) | 0 | 2.85 ( 0.09 - 92.93 ) | 0.5557 |
| 12 | Borrmanntype1 | 33.1 (3-365.48) | 0.004 | 0.79 ( 0.03 - 21.08 ) | 0.8871 |
| 13 | Borrmanntype2 | 13 (1.73-97.67) | 0.013 | 0.49 ( 0.03 - 9 ) | 0.6341 |
| 14 | Borrmanntype3 | 14.47 (1.99-104.95) | 0.008 | 0.67 ( 0.04 - 11.31 ) | 0.7821 |
| 15 | Borrmanntype4 | 55.6 (7.21-429.11) | 0 | 1.61 ( 0.09 - 30.41 ) | 0.7515 |
| 16 | Borrmanntype5 | 20.62 (1.87-227.53) | 0.014 | 0.57 ( 0.02 - 14.27 ) | 0.7329 |
| 17 | LNM | 1.08 (1.06-1.11) | 0 | 0.99 ( 0.92 - 1.07 ) | 0.875 |
| 18 | R1 | 5.48 (3.07-9.77) | 0 | 2.14 ( 0.94 - 4.9 ) | 0.0717 |
| 19 | R2 | 6.44 (3.25-12.78) | 0 | 2.31 ( 0.95 - 5.61 ) | 0.0648 |
| 20 | NLR | 1.77 (1.14-2.75) | 0.011 | 0.82 ( 0.49 - 1.36 ) | 0.4439 |
| 21 | PNI | 0.41 (0.26-0.65) | 0 | 0.87 ( 0.48 - 1.57 ) | 0.6528 |
| 22 | LLR | 2.09 (1.35-3.25) | 0.001 | 1.6 ( 0.94 - 2.72 ) | 0.083 |
| 23 | FAR | 2.65 (1.7-4.15) | 0 | 0.91 ( 0.49 - 1.69 ) | 0.7543 |
| 24 | FPR | 3.91 (2.36-6.5) | 0 | 2.02 ( 1.04 - 3.92 ) | 0.0387 |

**Abbreviations:** OS, overall survival; HR, hazard ratio; Cl, confidence interval; LNM, lymph node metastasis; FPR, the ratio of fibrinogen to prealbumin; NLR, the ratio of neutrophils to lymphocytes; PNI, albumin + 5 * lymphocytes; LLR, the ratio of lactate dehydrogenase to lymphocytes; FAR, the ratio of fibrinogen to albumin.

Table S5: Univariate and multivariate analysis for OS in patients with R0 resection

|  | Characteristics | HR (95% CI) | P | HR (95% CI) | P |
| --- | --- | --- | --- | --- | --- |
| 1 | AGE | 1.83 (1.38-2.42) | 0 | 1.57 ( 1.17 - 2.1 ) | 0.0029 |
| 2 | pT2 | 1.34 (0.59-3.04) | 0.477 | 2.34 ( 0.74 - 7.33 ) | 0.1459 |
| 3 | pT3 | 6.85 (4.06-11.55) | 0 | 11.33 ( 2.89 - 44.48 ) | 5.00E-04 |
| 4 | pT4a | 10.7 (5.87-19.51) | 0 | 16.45 ( 3.82 - 70.9 ) | 2.00E-04 |
| 5 | pT4b | 11.06 (6.1-20.06) | 0 | 14.21 ( 3.22 - 62.8 ) | 5.00E-04 |
| 6 | pN1 | 2.48 (1.52-4.04) | 0 | 2.18 ( 1.24 - 3.82 ) | 0.0066 |
| 7 | pN2 | 5.32 (3.46-8.19) | 0 | 5.51 ( 2.3 - 13.23 ) | 1.00E-04 |
| 8 | pN3a | 8.8 (5.8-13.33) | 0 | 6.85 ( 2.6 - 18.03 ) | 1.00E-04 |
| 9 | pN3b | 19.01 (11.65-31.02) | 0 | 10.94 ( 2.58 - 46.33 ) | 0.0012 |
| 10 | pTNM2 | 2.85 (1.65-4.9) | 0 | 0.36 ( 0.11 - 1.22 ) | 0.1004 |
| 11 | pTNM3 | 11.25 (6.97-18.16) | 0 | 0.25 ( 0.05 - 1.32 ) | 0.1019 |
| 12 | Borrmanntype1 | 4.25 (1.65-10.97) | 0.003 | 0.85 ( 0.24 - 3.04 ) | 0.8039 |
| 13 | Borrmanntype2 | 2.99 (1.55-5.76) | 0.001 | 0.37 ( 0.12 - 1.12 ) | 0.0792 |
| 14 | Borrmanntype3 | 3.76 (2.03-6.97) | 0 | 0.39 ( 0.13 - 1.16 ) | 0.0912 |
| 15 | Borrmanntype4 | 11.44 (5.35-24.46) | 0 | 0.79 ( 0.23 - 2.63 ) | 0.6956 |
| 16 | Borrmanntype5 | 9.74 (3.77-25.14) | 0 | 0.59 ( 0.15 - 2.23 ) | 0.434 |
| 17 | LNM | 1.1 (1.09-1.12) | 0 | 1 ( 0.96 - 1.05 ) | 0.8733 |
| 18 | NLR | 1.41 (1.06-1.86) | 0.017 | 1.09 ( 0.79 - 1.5 ) | 0.5948 |
| 19 | PNI | 0.5 (0.37-0.67) | 0 | 0.87 ( 0.61 - 1.24 ) | 0.4387 |
| 20 | LLR | 1.43 (1.08-1.9) | 0.013 | 1.14 ( 0.83 - 1.57 ) | 0.4104 |
| 21 | FAR | 1.98 (1.51-2.6) | 0 | 0.91 ( 0.65 - 1.28 ) | 0.6003 |
| 22 | FPR | 2.67 (2.03-3.53) | 0 | 1.5 ( 1.04 - 2.18 ) | 0.0308 |
| 23 | SEX | 0.94 (0.69-1.28) | 0.71 | NA | NA |

**Abbreviations:** OS, overall survival; HR, hazard ratio; Cl, confidence interval; LNM, lymph node metastasis; FPR, the ratio of fibrinogen to prealbumin; NLR, the ratio of neutrophils to lymphocytes; PNI, albumin + 5 * lymphocytes; LLR, the ratio of lactate dehydrogenase to lymphocytes; FAR, the ratio of fibrinogen to albumin.

Table S6: Univariate and multivariate analysis for OS in patients with R2 resection

|  | Characteristics | HR (95% CI) | P | HR (95% CI) | P |
| --- | --- | --- | --- | --- | --- |
| 1 | pN1 | 3.69 (0.43-31.37) | 0.231 | 3.79 ( 0.44 - 32.4 ) | 0.2235 |
| 2 | pN2 | 6.3 (0.76-52.36) | 0.089 | 5.75 ( 0.66 - 49.93 ) | 0.1124 |
| 3 | pN3a | 9.52 (1.14-79.44) | 0.037 | 7.9 ( 0.89 - 70.43 ) | 0.0641 |
| 4 | pN3b | 4.75 (0.59-38.24) | 0.144 | 4.16 ( 0.51 - 34.04 ) | 0.1837 |
| 5 | Borrmanntype3 | 0.26 (0.08-0.85) | 0.025 | 0.32 ( 0.09 - 1.09 ) | 0.0679 |
| 6 | Borrmanntype4 | 0.58 (0.12-2.69) | 0.483 | 0.57 ( 0.1 - 3.31 ) | 0.5266 |
| 7 | Borrmanntype5 | 0.67 (0.14-3.14) | 0.611 | 0.47 ( 0.09 - 2.37 ) | 0.3578 |
| 8 | SEX | 0.71 (0.33-1.51) | 0.372 | NA | NA |
| 9 | AGE | 1.59 (0.78-3.23) | 0.198 | NA | NA |
| 10 | pT4a | 0.4 (0.09-1.83) | 0.238 | NA | NA |
| 11 | pT4b | 1.02 (0.47-2.19) | 0.964 | NA | NA |
| 12 | pTNM3 | 2.01 (0.47-8.55) | 0.346 | NA | NA |
| 13 | NLR | 0.96 (0.41-2.23) | 0.917 | NA | NA |
| 14 | PNI | 1.23 (0.6-2.52) | 0.578 | NA | NA |
| 15 | LLR | 0.55 (0.26-1.19) | 0.129 | NA | NA |
| 16 | LNM | 1.01 (0.99-1.04) | 0.286 | NA | NA |
| 17 | FPR | 1.98 (0.75-5.24) | 0.169 | NA | NA |
| 18 | FAR | 1.58 (0.71-3.49) | 0.259 | NA | NA |

**Abbreviations:** OS, overall survival; HR, hazard ratio; Cl, confidence interval; LNM, lymph node metastasis; FPR, the ratio of fibrinogen to prealbumin; NLR, the ratio of neutrophils to lymphocytes; PNI, albumin + 5 * lymphocytes; LLR, the ratio of lactate dehydrogenase to lymphocytes; FAR, the ratio of fibrinogen to albumin.

Table S7: Univariate and multivariate analysis for OS in stage I patients group

|  | Characteristics | HR (95% CI) | P | HR (95% CI) | P |
| --- | --- | --- | --- | --- | --- |
| 1 | SEX | 0.15 (0.02-1.1) | 0.062 | NA | NA |
| 2 | AGE | 2.77 (1.05-7.29) | 0.039 | NA | NA |
| 3 | pT2 | 1.07 (0.36-3.23) | 0.902 | NA | NA |
| 4 | pN1 | 0.6 (0.08-4.48) | 0.617 | NA | NA |
| 5 | Borrmanntype1 | 0 (0-Inf) | 0.998 | NA | NA |
| 6 | Borrmanntype2 | 1.2 (0.42-3.46) | 0.735 | NA | NA |
| 7 | Borrmanntype3 | 0.3 (0.08-1.08) | 0.065 | NA | NA |
| 8 | Borrmanntype4 | 0 (0-Inf) | 0.999 | NA | NA |
| 9 | LNM | 0.52 (0.09-2.94) | 0.462 | NA | NA |
| 10 | NLR | 0.73 (0.24-2.21) | 0.58 | NA | NA |
| 11 | PNI | 0.92 (0.21-3.97) | 0.908 | NA | NA |
| 12 | LLR | 0.33 (0.08-1.43) | 0.137 | NA | NA |
| 13 | FAR | 1.4 (0.51-3.9) | 0.516 | NA | NA |
| 14 | FPR | 1.12 (0.37-3.37) | 0.842 | NA | NA |

**Abbreviations:** OS, overall survival; HR, hazard ratio; Cl, confidence interval; LNM, lymph node metastasis; FPR, the ratio of fibrinogen to prealbumin; NLR, the ratio of neutrophils to lymphocytes; PNI, albumin + 5 * lymphocytes; LLR, the ratio of lactate dehydrogenase to lymphocytes; FAR, the ratio of fibrinogen to albumin.

Table S8: Univariate and multivariate analysis for OS in stage II patients group

|  | Characteristics | HR (95% CI) | P | HR (95% CI) | P |
| --- | --- | --- | --- | --- | --- |
| 1 | AGE | 2.67 (1.4-5.08) | 0.003 | 2.4 ( 1.23 - 4.7 ) | 0.0107 |
| 2 | pN1 | 2.24 (1.14-4.37) | 0.019 | 2.52 ( 1.27 - 5.01 ) | 0.0083 |
| 3 | pN2 | 1.81 (0.72-4.54) | 0.205 | 2.06 ( 0.81 - 5.27 ) | 0.1304 |
| 4 | pN3 | 0 (0-Inf) | 0.997 | 0 ( 0 - Inf ) | 0.9966 |
| 5 | R1 | 3.28 (0.79-13.59) | 0.101 | 4.11 ( 0.92 - 18.3 ) | 0.0635 |
| 6 | R2 | 7.1 (1.69-29.88) | 0.008 | 3.91 ( 0.9 - 17.03 ) | 0.0696 |
| 7 | FPR | 2.41 (1.33-4.37) | 0.004 | 1.99 ( 1.06 - 3.73 ) | 0.0328 |
| 8 | SEX | 1.07 (0.56-2.05) | 0.827 | NA | NA |
| 9 | Borrmanntype2 | 13800291.94 (0-Inf) | 0.997 | NA | NA |
| 10 | pT2 | 1 (0.19-5.15) | 1 | NA | NA |
| 11 | pT3 | 1.8 (0.43-7.5) | 0.419 | NA | NA |
| 12 | pT4a | 3.82 (0.74-19.69) | 0.109 | NA | NA |
| 13 | LNM | 1.09 (0.93-1.27) | 0.272 | NA | NA |
| 14 | Borrmanntype3 | 16508169.28 (0-Inf) | 0.997 | NA | NA |
| 15 | Borrmanntype4 | 81769020.83 (0-Inf) | 0.997 | NA | NA |
| 16 | Borrmanntype1 | 11023803.04 (0-Inf) | 0.997 | NA | NA |
| 17 | PNI | 0.59 (0.31-1.11) | 0.102 | NA | NA |
| 18 | LLR | 0.88 (0.46-1.71) | 0.715 | NA | NA |
| 19 | FAR | 0.99 (0.54-1.83) | 0.981 | NA | NA |
| 20 | Borrmanntype5 | 1 (0-Inf) | 1 | NA | NA |
| 21 | NLR | 1.61 (0.88-2.92) | 0.119 | NA | NA |

**Abbreviations:** OS, overall survival; HR, hazard ratio; Cl, confidence interval; LNM, lymph node metastasis; FPR, the ratio of fibrinogen to prealbumin; NLR, the ratio of neutrophils to lymphocytes; PNI, albumin + 5 * lymphocytes; LLR, the ratio of lactate dehydrogenase to lymphocytes; FAR, the ratio of fibrinogen to albumin.

Table S9: Univariate and multivariate analysis for OS in stage III patients group

|  | Characteristics | HR (95% CI) | P | HR (95% CI) | P |
| --- | --- | --- | --- | --- | --- |
| 1 | pN1 | 2.01 (0.74-5.5) | 0.172 | 1.86 ( 0.67 - 5.11 ) | 0.2315 |
| 2 | pN2 | 2.53 (1.02-6.3) | 0.046 | 2.99 ( 1.18 - 7.58 ) | 0.0209 |
| 3 | pN3a | 3.39 (1.38-8.38) | 0.008 | 4.05 ( 1.57 - 10.47 ) | 0.0039 |
| 4 | pN3b | 5.8 (2.31-14.57) | 0 | 4.11 ( 1.31 - 12.91 ) | 0.0156 |
| 5 | Borrmanntype2 | 0.34 (0.16-0.74) | 0.006 | 0.29 ( 0.13 - 0.66 ) | 0.003 |
| 6 | Borrmanntype3 | 0.48 (0.23-0.98) | 0.044 | 0.39 ( 0.18 - 0.83 ) | 0.0142 |
| 7 | Borrmanntype4 | 0.85 (0.37-1.93) | 0.699 | 0.72 ( 0.3 - 1.72 ) | 0.4551 |
| 8 | Borrmanntype5 | 0.68 (0.28-1.66) | 0.391 | 0.43 ( 0.16 - 1.11 ) | 0.08 |
| 9 | LNM | 1.04 (1.02-1.05) | 0 | 1.01 ( 0.98 - 1.03 ) | 0.7127 |
| 10 | R1 | 1.69 (1.18-2.44) | 0.005 | 1.5 ( 1.01 - 2.23 ) | 0.0421 |
| 11 | R2 | 3.5 (2.35-5.2) | 0 | 3.09 ( 2 - 4.79 ) | 0 |
| 12 | NLR | 1.32 (1.01-1.73) | 0.041 | 1.08 ( 0.8 - 1.45 ) | 0.6333 |
| 13 | LLR | 1.62 (1.23-2.11) | 0 | 1.21 ( 0.9 - 1.64 ) | 0.2072 |
| 14 | FPR | 1.47 (1.1-1.96) | 0.009 | 1.5 ( 1.09 - 2.06 ) | 0.0128 |
| 15 | SEX | 1.11 (0.83-1.48) | 0.499 | NA | NA |
| 16 | AGE | 1.15 (0.87-1.5) | 0.326 | NA | NA |
| 17 | pT3 | 8783071.18 (0-Inf) | 0.992 | NA | NA |
| 18 | pT4a | 7818914.76 (0-Inf) | 0.992 | NA | NA |
| 19 | pT4b | 10582840.69 (0-Inf) | 0.992 | NA | NA |
| 20 | PNI | 0.77 (0.58-1.01) | 0.058 | NA | NA |
| 21 | FAR | 1.28 (0.97-1.69) | 0.08 | NA | NA |

**Abbreviations:** OS, overall survival; HR, hazard ratio; Cl, confidence interval; LNM, lymph node metastasis; FPR, the ratio of fibrinogen to prealbumin; NLR, the ratio of neutrophils to lymphocytes; PNI, albumin + 5 * lymphocytes; LLR, the ratio of lactate dehydrogenase to lymphocytes; FAR, the ratio of fibrinogen to albumin.
